# Supplementary material for: Effect of dietary pyrroloquinoline quinone disodium in sows on intestinal health of the offspring
Source: Royal Society of Chemistry journal article supplement (doi:10.1039/d0fo01403f), 2020-01-01
Supplement: d0fo01403f1.pdf [file d0fo01403f1.pdf]

Supplementary Table 1. Primers used for Real-time PCR

| Gene                    | Primer sequence (5'to3')                             | Product size (bp) | Genbank        |
|-------------------------|------------------------------------------------------|-------------------|----------------|
| Reference gene          |                                                      |                   |                |
| GAPDH                   | F: ATGGTGAAGGTCGGAGTGAA<br>R: CCGTGGGTGGAATCATACTG   | 155               | NM_001206359.1 |
| Antioxidant status      |                                                      |                   |                |
| HO1                     | F: AGGCTGAGAATGCCGAGTTC<br>R: TGTGGTACAAGGACGCCATC   | 90                | NM_001004027.1 |
| NQO1                    | F: CCAGCAGCCCCGGCCAATCTG<br>R: AGGTCCGACACGGCGACCTC  | 160               | NM_001159613.1 |
| SOD1                    | F: TCCATGTCCATCAGTTTGGGA<br>R: AGTCACATTGCCCAGGTCTC  | 131               | NM_001190422.1 |
| CAT                     | F: ACGCCTGTGTGAGAACATTG<br>R: GTCCAGAAGAGCCTGAATGC   | 124               | NM_214301.2    |
| SOD2                    | F: TGGAGGCCACATCAATCATA<br>R: TTTCGAAGGAACCAAAGTCG   | 113               | NM_214127.2    |
| GPX4                    | F: CACCCTCTGTGGAAGTGGAT<br>R: TCACCACACAGCCGTTCTTA   | 112               | NM_214407.1    |
| GPX1                    | F: AAATGCTCACCCGCTCTTC<br>R: GTCATTGCGACACACTGGAG    | 118               | NM_214201.1    |
| SOD3                    | F: ACGCTGCTCTGTGCTTACCT<br>R: CTGCCAGATCTCCGTCCTT    | 135               | NM_001078688.1 |
| GCLC                    | F: CTTGCCTCTTGCTGTGTGAT<br>R: CCACTCATGTGCCTCGATGT   | 159               | XM_001926378.4 |
| MGST1                   | F: TTGGCGCGCAATCTACCACA<br>R: TCCTCGGCTCCCTTCCCACTTA | 239               | NM_214300.1    |
| UGT1A1                  | F: GATCCTTTCCTGCAACGCAT<br>R: GGAAGGTCATGTGATCTGAG   | 313               | XM_001927673   |
| TXNRD1                  | F: CTTTACCTTATTGCCCGGGT<br>R: GTTCACCGATTTTGTTGGCC   | 162               | NM_214154.2    |
| Cytokines               |                                                      |                   |                |
| TNF- $\alpha$           | CATGAGCACTGAGAGCATGA<br>CGATAACTTCGAAGTGCAGT         | 170               | NM_214022.1    |
| IL- $\alpha$            | F: CTGAAGAAGAGACGGTTGAG<br>R: GCACTGGTGGTT GATGAC    | 162               | NM_214029      |
| IL-1 $\beta$            | F: GTTCTCTGAGAAATGGGAGC<br>R: CTGGTCATCATCACAGAAGG   | 143               | NM_214055.1    |
| IL-2                    | F: TTGCACTCATGGCAAACGGT<br>R: ATTCTGTAGCCTGCTTGGGC   | 177               | NM_213861.1    |
| IL-6                    | F: AGCAAGGAGGTAAGTGGCAGA<br>R: GTGGTGGCTTTGTCTGGATT  | 257               | NM_001252429.1 |
| IL-8                    | F: ACTTCCAAACTGGCTGTTGC<br>R: GGAATGCGTATTTATGCACTGG | 120               | NM_213867.1    |
| Tight junction proteins |                                                      |                   |                |
| ZO-1                    | F: AGCTGCCTCTCAACAGAAAG<br>R: GTCTCTGGGCACTGTGTGAG   | 217               | XM_005659811.1 |
| Occludin                | F: GAGTACATGGCTGCTGCTGA<br>R: AACAAGGTGGCCTCTGTCTC   | 173               | NM_001163647.2 |
| Claudin 1               | F: CTGAACACCACTTTGCAAGC                              | 137               | NM_001244539.1 |

---

R: ATCCGCATCTTCTGCACCTC

Glucose transportein

|        |                                                         |     |                |
|--------|---------------------------------------------------------|-----|----------------|
| SLC2A1 | F: GCCTGAGACCAGTTGAAAGCAC<br>R: CTGCTTAGGTAAAGTTACAGGAG | 155 | XM_021096908.1 |
| SLC2A3 | F: TGCACGGGCTTTGTGCCGATG<br>R: AAGGAGGTGAAGATTAGGAA     | 132 | XM_021092391.1 |

---

GPx4, glutathione peroxidase 4; GPx1, glutathione peroxidase 1; CAT, catalase; SOD3, superoxide dismutase 3; SOD2, superoxide dismutase 2; SOD1, superoxide dismutase 1; NQO1, NAD(P)H quinone dehydrogenase 1; HO1, heme oxygenase 1; CYP1A1, cytochrome P450 family 1 subfamily A member 1; TXNRD1, thioredoxin reductase 1; GCLM, glutamate-cysteine ligase modifier; MGST1, microsomal glutathione S-transferase 1; UGT1A1, UDP glucuronosyl-transferase family 1 member A1; IL-1, interleukin 1; IL-6, interleukin 6; IL-8, interleukin 8; TNF- $\alpha$ , tumor necrosis factor  $\alpha$

**Supplementary Table 2.** 16s rDNA sequencing data analysis

| <b>Item</b> | <b>PE Reads</b> | <b>Raw Tags</b> | <b>Clean Tags</b> | <b>Effective Tags</b> | <b>AvgLen (bp)</b> | <b>Q20 %</b> | <b>Q30 %</b> | <b>GC %</b> | <b>Effective (%)</b> |
|-------------|-----------------|-----------------|-------------------|-----------------------|--------------------|--------------|--------------|-------------|----------------------|
| Con1        | 48,276          | 43,350          | 35,892            | 35,321                | 419                | 94.48        | 89.48        | 53.35       | 73.16                |
| Con2        | 51,487          | 45,215          | 36,303            | 35,366                | 422                | 94.13        | 88.80        | 53.50       | 68.69                |
| Con3        | 34,880          | 31,082          | 25,449            | 24,811                | 420                | 94.30        | 89.13        | 53.19       | 71.13                |
| Con4        | 57,363          | 52,459          | 45,059            | 43,699                | 416                | 94.80        | 90.12        | 52.02       | 76.18                |
| Con5        | 41,882          | 37,718          | 31,338            | 30,484                | 422                | 94.39        | 89.35        | 52.93       | 72.79                |
| PQQ1        | 37,162          | 34,150          | 29,107            | 28,369                | 419                | 94.93        | 90.34        | 52.79       | 76.34                |
| PQQ2        | 50,437          | 45,283          | 38,170            | 37,370                | 419                | 94.40        | 89.44        | 52.45       | 74.09                |
| PQQ3        | 35,494          | 32,272          | 27,076            | 26,449                | 420                | 94.62        | 89.78        | 52.71       | 74.52                |
| PQQ4        | 47,231          | 42,655          | 36,441            | 35,041                | 417                | 94.70        | 89.97        | 50.91       | 74.19                |
| PQQ5        | 68,548          | 60,036          | 49,295            | 48,797                | 418                | 94.23        | 89.00        | 52.99       | 71.19                |

PE Reads is the number of double-ended reads obtained by sequencing; Raw Tags is the number of original sequences obtained by double-ended reads; Clean Tags is the number of optimized sequences obtained by filtering the original sequence; and Effective Tags is the number of valid sequences after filtering the chimeras by Clean Tags ;AvgLen (bp) is the average sequence length of the sample; Effective (%) is the percentage of Effective Tags to PE Reads; Q20%, the percentage of the sequence with the quality value equal or greater than 20; Q30%, the percentage of the sequence with the quality value equal or greater than 30; GC%, the percentage of GC base; Con, post-weaning piglets from control group; PQQ, post-weaning piglets from PQQ·Na<sub>2</sub> group

**Supplementary Table 3.** 16s rDNA sequencing data analysis

| Item | Kindom | Phylum | Class  | Order  | Family | Genus  | Species |
|------|--------|--------|--------|--------|--------|--------|---------|
| Con1 | 26,905 | 26,905 | 26,904 | 26,904 | 26,855 | 25,802 | 23,515  |
| Con2 | 27,859 | 27,859 | 27,853 | 27,853 | 27,842 | 25,308 | 22,471  |
| Con3 | 18,591 | 18,591 | 18,573 | 18,571 | 18,565 | 17,646 | 16,366  |
| Con4 | 37,126 | 37,126 | 37,126 | 37,110 | 37,059 | 35,899 | 27,202  |
| Con5 | 25,800 | 25,800 | 25,800 | 25,796 | 25,782 | 24,851 | 17,429  |
| PQQ1 | 23,568 | 23,568 | 23,558 | 23,558 | 23,448 | 22,464 | 18,848  |
| PQQ2 | 29,681 | 29,681 | 29,679 | 29,679 | 29,641 | 28,326 | 25,806  |
| PQQ3 | 20,460 | 20,460 | 20,455 | 20,455 | 20,445 | 19,402 | 17,553  |
| PQQ4 | 30,923 | 30,923 | 30,923 | 30,923 | 30,899 | 28,726 | 26,897  |
| PQQ5 | 40,072 | 40,072 | 40,071 | 40,071 | 40,071 | 37,059 | 32,699  |
